# Supplementary material
Source: publisher site journal article supplement (https://www.dovepress.com/article/411392)
Supplement: Supplementary file 1 [file get_supplementary_file.php]

**Supplementary Table 1** : Comorbidity domains

|                                                   | Included ICD-10/ ATC codes                                                                                                                      | References                                                                                       |
|---------------------------------------------------|-------------------------------------------------------------------------------------------------------------------------------------------------|--------------------------------------------------------------------------------------------------|
| Cardiovascular disease                            | ICD-10: I10-I15 I20-I25 I46 I50.0 I50.1 I50.9 I60-I67 I69-I72 I74 G45.0 G45.8-G45.9 G46<br>ATC: C01A-C01B, C01D, C02A, C02C, C02K, C04, C07-C09 | <i>Frederiksen et al<sup>9</sup></i>                                                             |
| Obstructive pulmonary disease                     | ICD-10: J40-J47 J96.1 J98.1-2<br>ATC: R03                                                                                                       | <i>Frederiksen et al<sup>9</sup></i>                                                             |
| Diabetes                                          | ICD-10: E10-E11 E13-E14 H360 G590 H280 H334B H360 M142 N083<br>ATC: A10                                                                         | <i>Frederiksen et al<sup>9</sup></i><br>Added by the authors: E13 G590 H280 H334B H360 M142 N083 |
| Dementia                                          | ICD-10: F00-F03 G30<br>ATC: N06D                                                                                                                | Added by the authors: F00-F03 G30<br><i>Kristensen et al<sup>4</sup></i>                         |
| Liver disease                                     | ICD-10: B150 B16-19 K70-K73 K76.6 I85                                                                                                           | <i>Frederiksen et al<sup>9</sup></i>                                                             |
| Kidney disease                                    | ICD-10: I12-I13 N00-N05 N07 N11 N14 N17-N19                                                                                                     | <i>Frederiksen et al<sup>9</sup></i>                                                             |
| Chronic nerve disease                             | ICD-10: G10-G14 G20-G22 G35 G80-G83                                                                                                             | <i>Kristensen et al<sup>4</sup></i><br>Added by the authors: G10-G14 G80-G83                     |
| Other malignant tumors and cerebral benign tumors | IDC10: C00-C96, excl. C18/C20 & C44. C70-C71, C751-C753, D32, D330-D332, D352-D354, D42, D430-D432, D443-D445                                   | <i>Kristensen et al<sup>4</sup></i><br>Added by the authors: C00-C96, excl. C18/C20 & C44        |
| Connective tissue disease                         | ICD-10: M05-M06 M10 M30-M36 D86<br>ATC: M04A M01C                                                                                               | <i>Frederiksen et al<sup>9</sup></i><br>M09A H05A not included                                   |
| Affective disorders                               | ICD-10: F30-F39<br>ATC: N06A                                                                                                                    | <i>Krupchanka et al<sup>5</sup></i><br><i>Kristensen et al<sup>4</sup></i> N06A                  |
| Schizophrenic spectrum disorder                   | ICD-10: F20-F29                                                                                                                                 | <i>Krupchanka et al<sup>5</sup></i>                                                              |
| Adult personality disorder                        | ICD-10: F60-F69                                                                                                                                 | <i>Krupchanka et al<sup>5</sup></i>                                                              |
| Psychoactive substance abuse disorder             | ICD-10: F10-F19                                                                                                                                 | <i>Krupchanka et al<sup>5</sup></i>                                                              |

Abbrev. ICD-10 International Classification of Disease 10<sup>th</sup> version, ATC Anatomical therapeutic chemical classification system

**Supplementary Table 2 : Frequencies and proportions by hospital**

|                           | Hospital of definitive treatment |    |      |    |      |    |      |    |      |    |      |    |      |    |      |    |      |    |      |    |      |    |      |    |      |    |      |    | Total |      |      |      |      |      |       |    |
|---------------------------|----------------------------------|----|------|----|------|----|------|----|------|----|------|----|------|----|------|----|------|----|------|----|------|----|------|----|------|----|------|----|-------|------|------|------|------|------|-------|----|
|                           | A                                |    | B    |    | C    |    | D    |    | E    |    | F    |    | G    |    | H    |    | I    |    | J    |    | K    |    | L    |    | M    |    | N    |    |       | O    |      | P    |      | Q    |       |    |
|                           | Freq                             | %  | Freq | %  | Freq | %  | Freq | %  | Freq | %  | Freq | %  | Freq | %  | Freq | %  | Freq | %  | Freq | %  | Freq | %  | Freq | %  | Freq | %  | Freq | %  |       | Freq | %    | Freq | %    | Freq | %     |    |
| Age group                 |                                  |    |      |    |      |    |      |    |      |    |      |    |      |    |      |    |      |    |      |    |      |    |      |    |      |    |      |    |       |      |      |      |      |      |       |    |
| <50                       | 18                               | 2  | 38   | 3  | 56   | 4  | 60   | 4  | 75   | 4  | 76   | 4  | 87   | 3  | 101  | 4  | 105  | 4  | 127  | 4  | 213  | 7  | 139  | 5  | 106  | 3  | 101  | 3  | 134   | 4    | 135  | 4    | 165  | 4    | 1736  | 4  |
| 50-64                     | 242                              | 23 | 254  | 20 | 304  | 21 | 386  | 23 | 363  | 21 | 449  | 22 | 558  | 22 | 600  | 23 | 601  | 21 | 664  | 23 | 844  | 28 | 723  | 24 | 708  | 21 | 813  | 23 | 885   | 24   | 844  | 23   | 853  | 21   | 10091 | 23 |
| 65-74                     | 356                              | 34 | 411  | 32 | 509  | 35 | 573  | 35 | 610  | 35 | 724  | 35 | 931  | 37 | 934  | 35 | 1045 | 37 | 1044 | 36 | 991  | 33 | 992  | 33 | 1131 | 34 | 1336 | 37 | 1359  | 37   | 1440 | 38   | 1474 | 36   | 15860 | 36 |
| 75-84                     | 308                              | 30 | 423  | 33 | 443  | 31 | 448  | 27 | 501  | 29 | 623  | 30 | 715  | 28 | 743  | 28 | 805  | 29 | 721  | 25 | 696  | 23 | 841  | 28 | 966  | 29 | 1001 | 28 | 986   | 27   | 1022 | 27   | 1185 | 29   | 12427 | 28 |
| 85+                       | 114                              | 11 | 166  | 13 | 139  | 10 | 187  | 11 | 194  | 11 | 204  | 10 | 238  | 9  | 269  | 10 | 257  | 9  | 331  | 11 | 225  | 8  | 278  | 9  | 383  | 12 | 352  | 10 | 283   | 8    | 306  | 8    | 431  | 10   | 4357  | 10 |
| Gender                    |                                  |    |      |    |      |    |      |    |      |    |      |    |      |    |      |    |      |    |      |    |      |    |      |    |      |    |      |    |       |      |      |      |      |      |       |    |
| Male                      | 550                              | 53 | 667  | 52 | 749  | 52 | 904  | 55 | 897  | 51 | 1089 | 52 | 1438 | 57 | 1452 | 55 | 1535 | 55 | 1529 | 53 | 1736 | 58 | 1663 | 56 | 1724 | 52 | 1995 | 55 | 2076  | 57   | 2042 | 54   | 2159 | 53   | 24205 | 54 |
| Female                    | 488                              | 47 | 625  | 48 | 702  | 48 | 750  | 45 | 846  | 49 | 987  | 48 | 1091 | 43 | 1195 | 45 | 1278 | 45 | 1358 | 47 | 1233 | 42 | 1310 | 44 | 1570 | 48 | 1608 | 45 | 1571  | 43   | 1705 | 46   | 1949 | 47   | 20266 | 46 |
| Location of cancer        |                                  |    |      |    |      |    |      |    |      |    |      |    |      |    |      |    |      |    |      |    |      |    |      |    |      |    |      |    |       |      |      |      |      |      |       |    |
| Colon                     | 1017                             | 98 | 1241 | 96 | 1337 | 92 | 1201 | 73 | 1219 | 70 | 1708 | 82 | 1549 | 61 | 1743 | 66 | 1882 | 67 | 1986 | 69 | 1123 | 38 | 1932 | 65 | 2318 | 70 | 2429 | 67 | 2069  | 57   | 2661 | 71   | 2734 | 67   | 30149 | 68 |
| Rectum                    | 21                               | 2  | 51   | 4  | 114  | 8  | 453  | 27 | 524  | 30 | 368  | 18 | 980  | 39 | 904  | 34 | 931  | 33 | 901  | 31 | 1846 | 62 | 1041 | 35 | 976  | 30 | 1174 | 33 | 1578  | 43   | 1086 | 29   | 1374 | 33   | 14322 | 32 |
| UICC stadium              |                                  |    |      |    |      |    |      |    |      |    |      |    |      |    |      |    |      |    |      |    |      |    |      |    |      |    |      |    |       |      |      |      |      |      |       |    |
| I                         | 141                              | 15 | 144  | 12 | 222  | 17 | 253  | 18 | 306  | 20 | 288  | 16 | 434  | 20 | 445  | 20 | 441  | 18 | 442  | 18 | 368  | 16 | 393  | 15 | 476  | 17 | 468  | 15 | 624   | 21   | 611  | 19   | 657  | 19   | 6713  | 18 |
| II                        | 310                              | 33 | 448  | 38 | 423  | 32 | 402  | 29 | 399  | 26 | 634  | 35 | 642  | 30 | 627  | 28 | 670  | 27 | 704  | 28 | 578  | 25 | 769  | 30 | 818  | 29 | 879  | 28 | 902   | 30   | 942  | 29   | 1023 | 29   | 11170 | 29 |
| III                       | 253                              | 27 | 312  | 26 | 332  | 25 | 360  | 26 | 352  | 23 | 470  | 26 | 587  | 27 | 550  | 24 | 631  | 26 | 645  | 26 | 560  | 24 | 710  | 27 | 712  | 25 | 850  | 28 | 668   | 22   | 835  | 26   | 852  | 24   | 9679  | 25 |
| IV                        | 227                              | 24 | 286  | 24 | 334  | 25 | 378  | 27 | 499  | 32 | 429  | 24 | 502  | 23 | 642  | 28 | 707  | 29 | 734  | 29 | 826  | 35 | 718  | 28 | 834  | 29 | 889  | 29 | 820   | 27   | 853  | 26   | 948  | 27   | 10626 | 28 |
| ASA score                 |                                  |    |      |    |      |    |      |    |      |    |      |    |      |    |      |    |      |    |      |    |      |    |      |    |      |    |      |    |       |      |      |      |      |      |       |    |
| I                         | 137                              | 14 | 299  | 28 | 281  | 21 | 178  | 12 | 228  | 14 | 320  | 16 | 594  | 24 | 632  | 25 | 747  | 28 | 669  | 24 | 691  | 25 | 521  | 18 | 710  | 23 | 768  | 23 | 512   | 16   | 767  | 21   | 814  | 21   | 8868  | 21 |
| II                        | 451                              | 46 | 465  | 43 | 656  | 49 | 758  | 50 | 865  | 51 | 1056 | 54 | 1279 | 52 | 1229 | 49 | 1270 | 47 | 1623 | 58 | 1529 | 55 | 1695 | 59 | 1663 | 54 | 1788 | 54 | 1776  | 54   | 2045 | 56   | 1961 | 50   | 22109 | 53 |
| III                       | 357                              | 36 | 258  | 24 | 341  | 26 | 512  | 34 | 530  | 32 | 544  | 28 | 534  | 22 | 590  | 23 | 619  | 23 | 464  | 17 | 523  | 19 | 607  | 21 | 651  | 21 | 713  | 21 | 899   | 27   | 769  | 21   | 997  | 26   | 9908  | 24 |
| IV+V                      | 38                               | 4  | 58   | 5  | 56   | 4  | 59   | 4  | 59   | 4  | 48   | 2  | 44   | 2  | 72   | 3  | 69   | 3  | 26   | 1  | 47   | 2  | 39   | 1  | 46   | 1  | 52   | 2  | 103   | 3    | 50   | 1    | 121  | 3    | 987   | 2  |
| WHO performance status    |                                  |    |      |    |      |    |      |    |      |    |      |    |      |    |      |    |      |    |      |    |      |    |      |    |      |    |      |    |       |      |      |      |      |      |       |    |
| 0                         | 256                              | 46 | 339  | 52 | 293  | 48 | 514  | 65 | 317  | 51 | 685  | 57 | 897  | 62 | 943  | 67 | 975  | 67 | 928  | 62 | 1037 | 70 | 668  | 43 | 1185 | 65 | 1072 | 60 | 1001  | 51   | 1387 | 66   | 1360 | 63   | 13857 | 60 |
| 1                         | 199                              | 36 | 199  | 31 | 197  | 33 | 155  | 20 | 181  | 29 | 319  | 27 | 306  | 21 | 269  | 19 | 281  | 19 | 414  | 28 | 328  | 22 | 564  | 37 | 372  | 20 | 454  | 25 | 597   | 31   | 411  | 20   | 533  | 25   | 5779  | 25 |
| 2                         | 65                               | 12 | 83   | 13 | 81   | 13 | 87   | 11 | 83   | 13 | 139  | 12 | 139  | 10 | 122  | 9  | 127  | 9  | 116  | 8  | 76   | 5  | 241  | 16 | 200  | 11 | 161  | 9  | 209   | 11   | 196  | 9    | 162  | 8    | 2287  | 10 |
| 3+4                       | 31                               | 6  | 25   | 4  | 35   | 6  | 30   | 4  | 39   | 6  | 53   | 4  | 103  | 7  | 76   | 5  | 72   | 5  | 46   | 3  | 46   | 3  | 65   | 4  | 80   | 4  | 112  | 6  | 148   | 8    | 95   | 5    | 103  | 5    | 1159  | 5  |
| Connective tissue disease |                                  |    |      |    |      |    |      |    |      |    |      |    |      |    |      |    |      |    |      |    |      |    |      |    |      |    |      |    |       |      |      |      |      |      |       |    |
| No                        | 959                              | 92 | 1200 | 93 | 1355 | 93 | 1537 | 93 | 1601 | 92 | 1941 | 93 | 2376 | 94 | 2456 | 93 | 2601 | 92 | 2634 | 91 | 2789 | 94 | 2712 | 91 | 2997 | 91 | 3302 | 92 | 3403  | 93   | 3462 | 92   | 3755 | 91   | 41080 | 92 |
| Yes                       | 79                               | 8  | 92   | 7  | 96   | 7  | 117  | 7  | 142  | 8  | 135  | 7  | 153  | 6  | 191  | 7  | 212  | 8  | 253  | 9  | 180  | 6  | 261  | 9  | 297  | 9  | 301  | 8  | 244   | 7    | 285  | 8    | 353  | 9    | 3391  | 8  |
| Other cancer              |                                  |    |      |    |      |    |      |    |      |    |      |    |      |    |      |    |      |    |      |    |      |    |      |    |      |    |      |    |       |      |      |      |      |      |       |    |
| No                        | 923                              | 89 | 1123 | 87 | 1302 | 90 | 1419 | 86 | 1548 | 89 | 1874 | 90 | 2241 | 89 | 2321 | 88 | 2495 | 89 | 2521 | 87 | 2644 | 89 | 2638 | 89 | 2811 | 85 | 3192 | 89 | 3077  | 84   | 3296 | 88   | 3523 | 86   | 38948 | 88 |
| Yes                       | 115                              | 11 | 169  | 13 | 149  | 10 | 235  | 14 | 195  | 11 | 202  | 10 | 288  | 11 | 326  | 12 | 318  | 11 | 366  | 13 | 325  | 11 | 335  | 11 | 483  | 15 | 411  | 11 | 570   | 16   | 451  | 12   | 585  | 14   | 5523  | 12 |
| Chronic pulmonary disease |                                  |    |      |    |      |    |      |    |      |    |      |    |      |    |      |    |      |    |      |    |      |    |      |    |      |    |      |    |       |      |      |      |      |      |       |    |
| No                        | 794                              | 76 | 993  | 77 | 1075 | 74 | 1266 | 77 | 1327 | 76 | 1590 | 77 | 2005 | 79 | 2041 | 77 | 2179 | 77 | 2163 | 75 | 2359 | 79 | 2252 | 76 | 2516 | 76 | 2851 | 79 | 2844  | 78   | 2882 | 77   | 3097 | 75   | 34234 | 77 |
| Yes                       | 244                              | 24 | 299  | 23 | 376  | 26 | 388  | 23 | 416  | 24 | 486  | 23 | 524  | 21 | 606  | 23 | 634  | 23 | 724  | 25 | 610  | 21 | 721  | 24 | 778  | 24 | 752  | 21 | 803   | 22   | 865  | 23   | 1011 | 25   | 10237 | 23 |
| Cardiovascular disease    |                                  |    |      |    |      |    |      |    |      |    |      |    |      |    |      |    |      |    |      |    |      |    |      |    |      |    |      |    |       |      |      |      |      |      |       |    |
| No                        | 365                              | 35 | 460  | 36 | 555  | 38 | 610  | 37 | 592  | 34 | 788  | 38 | 968  | 38 | 1003 | 38 | 1127 | 40 | 1146 | 40 | 1348 | 45 | 1146 | 39 | 1255 | 38 | 1338 | 37 | 1390  | 38   | 1456 | 39   | 1509 | 37   | 17056 | 38 |
| Yes                       | 673                              | 65 | 832  | 64 | 896  | 62 | 1044 | 63 | 1151 | 66 | 1288 | 62 | 1561 | 62 | 1644 | 62 | 1686 | 60 | 1741 | 60 | 1621 | 55 | 1827 | 61 | 2039 | 62 | 2265 | 63 | 2257  | 62   | 2291 | 61   | 2599 | 63   | 27415 | 62 |
| Dementia                  |                                  |    |      |    |      |    |      |    |      |    |      |    |      |    |      |    |      |    |      |    |      |    |      |    |      |    |      |    |       |      |      |      |      |      |       |    |
| No                        | 1023                             | 99 | 1269 | 98 | 1428 | 98 | 1609 | 97 | 1697 | 97 | 2046 | 99 | 2493 | 99 | 2593 | 98 | 2771 | 99 | 2809 | 97 | 2922 | 98 | 2905 | 98 | 3224 | 98 | 3553 | 99 | 3600  | 99   | 3698 | 99   | 4013 | 98   | 43653 | 98 |
| Yes                       | 15                               | 1  | 23   | 2  | 23   | 2  | 45   | 3  | 46   | 3  | 30   | 1  | 36   | 1  | 54   | 2  | 42   | 1  | 78   | 3  | 47   | 2  | 68   | 2  | 70   | 2  | 50   | 1  | 47    | 1    | 49   | 1    | 95   | 2    | 818   | 2  |
| Diabetes                  |                                  |    |      |    |      |    |      |    |      |    |      |    |      |    |      |    |      |    |      |    |      |    |      |    |      |    |      |    |       |      |      |      |      |      |       |    |
| No                        | 894                              | 86 | 1130 | 87 | 1284 | 88 | 1437 | 87 | 1474 | 85 | 1786 | 86 | 2207 | 87 | 2294 | 87 | 2436 | 87 | 2461 | 85 | 2618 | 88 | 2497 | 84 | 2861 | 87 | 3087 | 86 | 3185  | 87   | 3208 | 86   | 3584 | 87   | 38443 | 86 |
| Yes                       | 144                              | 14 | 162  | 13 | 167  | 12 | 217  | 13 | 269  | 15 | 290  | 14 | 322  | 13 | 353  | 13 | 377  | 13 | 426  | 15 | 351  | 12 | 476  | 16 | 433  | 13 | 516  | 14 | 462   | 13   | 539  | 14   | 524  | 13   | 6028  | 1  |

|                                                |      |    |      |    |      |     |      |     |      |    |      |    |      |    |      |    |      |     |      |    |      |    |      |    |      |    |      |    |      |    |      |    |      |    |       |    |  |  |
|------------------------------------------------|------|----|------|----|------|-----|------|-----|------|----|------|----|------|----|------|----|------|-----|------|----|------|----|------|----|------|----|------|----|------|----|------|----|------|----|-------|----|--|--|
| Yes                                            | 25   | 2  | 59   | 5  | 25   | 2   | 70   | 4   | 54   | 3  | 54   | 3  | 33   | 1  | 98   | 4  | 104  | 4   | 286  | 10 | 74   | 2  | 272  | 9  | 231  | 7  | 129  | 4  | 92   | 3  | 121  | 3  | 227  | 6  | 1954  | 4  |  |  |
| Skizoprenic spectrum or personality disorder   |      |    |      |    |      |     |      |     |      |    |      |    |      |    |      |    |      |     |      |    |      |    |      |    |      |    |      |    |      |    |      |    |      |    |       |    |  |  |
| No                                             | 1028 | 99 | 1283 | 99 | 1444 | 100 | 1646 | 100 | 1727 | 99 | 2062 | 99 | 2512 | 99 | 2631 | 99 | 2802 | 100 | 2841 | 98 | 2940 | 99 | 2930 | 99 | 3264 | 99 | 3575 | 99 | 3619 | 99 | 3724 | 99 | 4082 | 99 | 44110 | 99 |  |  |
| Yes                                            | 10   | 1  | 9    | 1  | 7    | 0   | 8    | 0   | 16   | 1  | 14   | 1  | 17   | 1  | 16   | 1  | 11   | 0   | 46   | 2  | 29   | 1  | 43   | 1  | 30   | 1  | 28   | 1  | 28   | 1  | 23   | 1  | 26   | 1  | 361   | 1  |  |  |
| Affective disorder                             |      |    |      |    |      |     |      |     |      |    |      |    |      |    |      |    |      |     |      |    |      |    |      |    |      |    |      |    |      |    |      |    |      |    |       |    |  |  |
| No                                             | 782  | 75 | 985  | 76 | 1140 | 79  | 1280 | 77  | 1346 | 77 | 1595 | 77 | 2019 | 80 | 2111 | 80 | 2291 | 81  | 2304 | 80 | 2366 | 80 | 2378 | 80 | 2643 | 80 | 2889 | 80 | 2974 | 82 | 3045 | 81 | 3192 | 78 | 35340 | 79 |  |  |
| Yes                                            | 256  | 25 | 307  | 24 | 311  | 21  | 374  | 23  | 397  | 23 | 481  | 23 | 510  | 20 | 536  | 20 | 522  | 19  | 583  | 20 | 603  | 20 | 595  | 20 | 651  | 20 | 714  | 20 | 673  | 18 | 702  | 19 | 916  | 22 | 9131  | 21 |  |  |
| Smoking status                                 |      |    |      |    |      |     |      |     |      |    |      |    |      |    |      |    |      |     |      |    |      |    |      |    |      |    |      |    |      |    |      |    |      |    |       |    |  |  |
| Active smoker                                  | 166  | 18 | 123  | 16 | 235  | 19  | 256  | 24  | 242  | 16 | 353  | 19 | 381  | 16 | 485  | 20 | 483  | 20  | 600  | 23 | 536  | 23 | 592  | 23 | 524  | 20 | 612  | 22 | 618  | 19 | 697  | 20 | 598  | 20 | 7501  | 20 |  |  |
| Ex-smoker                                      | 341  | 37 | 309  | 39 | 587  | 46  | 427  | 39  | 506  | 34 | 778  | 41 | 1066 | 45 | 1061 | 45 | 1027 | 42  | 1113 | 43 | 811  | 34 | 1149 | 45 | 918  | 35 | 960  | 35 | 1305 | 41 | 1457 | 42 | 1187 | 39 | 15002 | 40 |  |  |
| Never smoker                                   | 421  | 45 | 354  | 45 | 448  | 35  | 404  | 37  | 737  | 50 | 747  | 40 | 924  | 39 | 832  | 35 | 939  | 38  | 885  | 34 | 1007 | 43 | 822  | 32 | 1163 | 45 | 1172 | 43 | 1285 | 40 | 1320 | 38 | 1258 | 41 | 14718 | 40 |  |  |
| Body mass index class                          |      |    |      |    |      |     |      |     |      |    |      |    |      |    |      |    |      |     |      |    |      |    |      |    |      |    |      |    |      |    |      |    |      |    |       |    |  |  |
| Underweight                                    | 36   | 4  | 28   | 3  | 52   | 4   | 53   | 4   | 68   | 4  | 59   | 3  | 74   | 3  | 75   | 3  | 98   | 4   | 118  | 4  | 104  | 4  | 101  | 4  | 113  | 4  | 105  | 3  | 104  | 3  | 98   | 3  | 129  | 4  | 1415  | 4  |  |  |
| Normal                                         | 432  | 44 | 396  | 43 | 556  | 43  | 584  | 41  | 616  | 39 | 823  | 44 | 1019 | 42 | 1051 | 43 | 1136 | 46  | 1331 | 49 | 1232 | 48 | 1188 | 44 | 1320 | 49 | 1348 | 43 | 1296 | 38 | 1480 | 43 | 1598 | 44 | 17406 | 44 |  |  |
| Overweight                                     | 345  | 35 | 335  | 36 | 473  | 37  | 525  | 37  | 616  | 39 | 659  | 35 | 926  | 38 | 940  | 38 | 822  | 33  | 878  | 32 | 870  | 34 | 977  | 36 | 933  | 35 | 1150 | 37 | 1341 | 39 | 1207 | 35 | 1286 | 35 | 14283 | 36 |  |  |
| Obese                                          | 160  | 16 | 168  | 18 | 211  | 16  | 266  | 19  | 283  | 18 | 341  | 18 | 415  | 17 | 406  | 16 | 402  | 16  | 393  | 14 | 375  | 15 | 435  | 16 | 329  | 12 | 544  | 17 | 666  | 20 | 648  | 19 | 623  | 17 | 6665  | 17 |  |  |
| Alcohol consumed per week(units <sup>1</sup> ) |      |    |      |    |      |     |      |     |      |    |      |    |      |    |      |    |      |     |      |    |      |    |      |    |      |    |      |    |      |    |      |    |      |    |       |    |  |  |
| 0-14                                           | 803  | 88 | 864  | 96 | 1192 | 95  | 1063 | 92  | 1439 | 93 | 1660 | 88 | 1978 | 86 | 2069 | 86 | 2000 | 81  | 2101 | 80 | 2065 | 90 | 2167 | 85 | 2314 | 87 | 2357 | 85 | 2870 | 90 | 2922 | 85 | 2889 | 88 | 32753 | 87 |  |  |
| >14                                            | 113  | 12 | 38   | 4  | 63   | 5   | 97   | 8   | 101  | 7  | 221  | 12 | 320  | 14 | 331  | 14 | 460  | 19  | 533  | 20 | 220  | 10 | 390  | 15 | 352  | 13 | 401  | 15 | 331  | 10 | 534  | 15 | 382  | 12 | 4887  | 13 |  |  |
| Highest educational level                      |      |    |      |    |      |     |      |     |      |    |      |    |      |    |      |    |      |     |      |    |      |    |      |    |      |    |      |    |      |    |      |    |      |    |       |    |  |  |
| Short                                          | 395  | 40 | 617  | 50 | 588  | 43  | 730  | 46  | 772  | 46 | 762  | 38 | 1101 | 45 | 1071 | 42 | 757  | 28  | 856  | 32 | 963  | 33 | 958  | 34 | 818  | 26 | 1497 | 43 | 1582 | 45 | 1287 | 36 | 1561 | 39 | 16315 | 38 |  |  |
| Medium                                         | 427  | 43 | 465  | 38 | 599  | 43  | 657  | 41  | 652  | 39 | 913  | 45 | 1052 | 43 | 1088 | 43 | 1300 | 48  | 1143 | 42 | 1334 | 46 | 1373 | 49 | 1480 | 47 | 1529 | 44 | 1452 | 41 | 1772 | 49 | 1757 | 44 | 18993 | 45 |  |  |
| Long                                           | 174  | 17 | 154  | 12 | 194  | 14  | 202  | 13  | 239  | 14 | 335  | 17 | 296  | 12 | 394  | 15 | 650  | 24  | 694  | 26 | 593  | 21 | 469  | 17 | 842  | 27 | 438  | 13 | 483  | 14 | 565  | 16 | 634  | 16 | 7356  | 17 |  |  |
| Quartile of household income                   |      |    |      |    |      |     |      |     |      |    |      |    |      |    |      |    |      |     |      |    |      |    |      |    |      |    |      |    |      |    |      |    |      |    |       |    |  |  |
| 1st                                            | 255  | 25 | 480  | 37 | 402  | 28  | 529  | 32  | 622  | 36 | 516  | 25 | 670  | 27 | 645  | 24 | 479  | 17  | 857  | 30 | 625  | 21 | 722  | 25 | 494  | 15 | 1013 | 28 | 1041 | 29 | 779  | 21 | 1206 | 29 | 11335 | 26 |  |  |
| 2nd                                            | 259  | 25 | 316  | 25 | 379  | 26  | 393  | 24  | 444  | 25 | 552  | 27 | 683  | 27 | 755  | 29 | 631  | 23  | 667  | 23 | 678  | 23 | 742  | 25 | 724  | 22 | 1059 | 29 | 956  | 26 | 965  | 26 | 1142 | 28 | 11345 | 26 |  |  |
| 3rd                                            | 260  | 25 | 302  | 23 | 399  | 28  | 392  | 24  | 399  | 23 | 505  | 24 | 655  | 26 | 641  | 24 | 784  | 28  | 624  | 22 | 814  | 28 | 706  | 24 | 801  | 24 | 866  | 24 | 916  | 25 | 1018 | 27 | 970  | 24 | 11052 | 25 |  |  |
| 4th                                            | 259  | 25 | 188  | 15 | 269  | 19  | 335  | 20  | 277  | 16 | 498  | 24 | 518  | 21 | 601  | 23 | 906  | 32  | 723  | 25 | 839  | 28 | 764  | 26 | 1258 | 38 | 656  | 18 | 727  | 20 | 973  | 26 | 780  | 19 | 10571 | 24 |  |  |
| Participation in screening                     |      |    |      |    |      |     |      |     |      |    |      |    |      |    |      |    |      |     |      |    |      |    |      |    |      |    |      |    |      |    |      |    |      |    |       |    |  |  |
| Yes                                            | 195  | 76 | 152  | 70 | 241  | 74  | 283  | 78  | 309  | 74 | 441  | 79 | 520  | 76 | 458  | 71 | 464  | 74  | 423  | 65 | 377  | 61 | 430  | 63 | 514  | 68 | 654  | 77 | 667  | 75 | 654  | 72 | 704  | 73 | 7486  | 72 |  |  |
| No                                             | 63   | 24 | 66   | 30 | 86   | 26  | 81   | 22  | 108  | 26 | 119  | 21 | 160  | 24 | 185  | 29 | 162  | 26  | 227  | 35 | 241  | 39 | 248  | 37 | 244  | 32 | 199  | 23 | 220  | 25 | 252  | 28 | 254  | 27 | 2915  | 28 |  |  |
| Cohabitation status                            |      |    |      |    |      |     |      |     |      |    |      |    |      |    |      |    |      |     |      |    |      |    |      |    |      |    |      |    |      |    |      |    |      |    |       |    |  |  |
| Cohabiting                                     | 621  | 60 | 733  | 57 | 870  | 60  | 997  | 60  | 993  | 57 | 1260 | 61 | 1616 | 64 | 1635 | 62 | 1689 | 60  | 1312 | 46 | 1831 | 62 | 1539 | 52 | 1841 | 56 | 2115 | 59 | 2291 | 63 | 2374 | 63 | 2386 | 58 | 26103 | 59 |  |  |
| Alone                                          | 415  | 40 | 559  | 43 | 581  | 40  | 656  | 40  | 750  | 43 | 815  | 39 | 913  | 36 | 1010 | 38 | 1120 | 40  | 1567 | 54 | 1137 | 38 | 1406 | 48 | 1446 | 44 | 1487 | 41 | 1355 | 37 | 1370 | 37 | 1721 | 42 | 18308 | 41 |  |  |

Abbrev. Freq: frequency; UICC, Union for international Cancer Control; ASA, American Society of Anesthesiologists; WHO, World Health Organization

<sup>1</sup> One unit = 2 grams of pure ethanol. Cut off values for household income were 157 275, 196 232 and 270 272 respectively
